# Supplementary material for: Neutral Forces and Balancing Selection Interplay to Shape the Major Histocompatibility Complex Spatial Patterns in the Striped Hamster in Inner Mongolia: Suggestive of Broad-Scale Local Adaptation
Source: MDPI journal article supplement (doi:10.3390/genes14071500), 2023-07-22
Supplement: s1 [file s1]

**Table S1.** Sampling information of different populations of striped hamster

| Pop | Sites                               | Longitude | Latitude | Elevation(m) | Samples |
|-----|-------------------------------------|-----------|----------|--------------|---------|
| N1  | New Barag Right Banner, Hulun Buir  | 116.85°E  | 48.81°N  | 552          | 3       |
| N2  | East Ujimqin Banner, Xilin Gol      | 116.59°E  | 45.60°N  | 916          | 17      |
| N3  | Qog UI, Xilin Gol                   | 115.92°E  | 44.18°N  | 947          | 24      |
| N4  | Baiyin Siler, Xilin Gol             | 116.78°E  | 44.08°N  | 1215         | 1       |
| W2  | Abag Banner, Xilin Gol              | 114.97°E  | 44.03°N  | 1144         | 62      |
| W4  | West Ujimqin Banner, Xilin Gol      | 116.73°E  | 44.59°N  | 968          | 111     |
| W5  | Horqin Left Middle Banner, Tongliao | 121.55°E  | 44.27°N  | 203          | 4       |

**Table S2.** Characteristics of 7 microsatellite loci of striped hamster

| Loci   | Primer Sequence (5'→3')                                   | Allele Size (bp) | Genbank ID |
|--------|-----------------------------------------------------------|------------------|------------|
| CHM93  | F: TCTGTGTGTCTGTGAATGCG<br>R: GGATGTAAGATGGCTCCGAA        | 276              | FJ426316   |
| CHM108 | F: CAATGGCTGCTAAGAGAGGG<br>R: GTTCTTTCCCACTCACAATTTTCCTTC | 276              | FJ426318   |
| CHM120 | F: GATAGGAGGGAGCAAAAGGG<br>R: CCTGAGAGCCTCAGAGCAGT        | 242              | FJ426320   |
| CHM124 | F: CAGATGCCCAAACCTCTCTCC<br>R: GTTCTTGTCACCCCATGGACTACA   | 284              | FJ426321   |
| CHM140 | F: GCAGCTGGTTTTGAGCTACC<br>R: GTTCTTTGTTTGATCACTGGAACCCA  | 250              | FJ426323   |
| CHM147 | F: CATCTGGGCTTTCAATGGAT<br>R: GCTCCCTAAATAACCCCCAA        | 241              | FJ426324   |
| SSR29  | F: CAGGGAAATGATGATACC<br>R: TCAGCAGCACTCAGAAGG            | 357              | EF530613   |

**Table S3.** Eleven flea species and nineteen gamasid mite species detected in this study

| No. | Flea species                       | Gamasid Mite Species                              |
|-----|------------------------------------|---------------------------------------------------|
| 1   | <i>Citellophilus tesquorum</i>     | <i>Eulaclaps novus</i>                            |
| 2   | <i>Neopsylla bidentatiformis</i>   | <i>Eulaclaps cricetuli</i>                        |
| 3   | <i>Neopsylla pleskei</i>           | <i>Haemogamasus kusumotoi</i>                     |
| 4   | <i>Frontopsylla luculenta</i>      | <i>Haemogamasus mandschuricus</i>                 |
| 5   | <i>Rhadinopsylla dives</i>         | <i>Haemogamasus kitanoi</i>                       |
| 6   | <i>Stenoponia formozovi</i>        | <i>Hirstionyssus transiliensis neimongkuensis</i> |
| 7   | <i>Amphipsylla longispina</i>      | <i>Haemolalaps glasgowi</i>                       |
| 8   | <i>Amphipsylla primaris</i>        | <i>Haemolalaps semidestertus</i>                  |
| 9   | <i>Ophthalmopsylla kukuschkini</i> | <i>Hypoaspis miles</i>                            |
| 10  | <i>Nosopsylla laeviceps</i>        | <i>Hypoaspis pavlovski</i>                        |
| 11  | <i>Unident_flea</i> <sup>a</sup>   | <i>Hypoaspis lubrica</i>                          |
| 12  | /                                  | <i>Macrocheles decoloratus</i>                    |
| 13  | /                                  | <i>Macrocheles matrius</i>                        |

|    |   |                                          |
|----|---|------------------------------------------|
| 14 | / | <i>Poecilochirus necrophori</i>          |
| 15 | / | <i>Poecilochirus davydovae</i>           |
| 16 | / | <i>Parasitus</i> sp.1 <sup>b</sup>       |
| 17 | / | <i>Parasitus</i> sp.2 <sup>b</sup>       |
| 18 | / | <i>Parasitus</i> sp.3 <sup>b</sup>       |
| 19 | / | <i>Unident_gamasid_mite</i> <sup>a</sup> |

<sup>a</sup> impossible to determine its taxonomic classification due to specimen damage;

<sup>b</sup> Undetermined species of the genus *Parasitus*

**Table S4.** Results from maximum likelihood codon-based models of selection using EasTyCodeml.

| Model | np  | Ln L  | Parameter estimates                                                                                | Model compared | LRT P-value  |
|-------|-----|-------|----------------------------------------------------------------------------------------------------|----------------|--------------|
| M3    | 164 | -2014 | $p_0 = 0.583, p_1 = 0.274, p_2 = 0.143,$<br>$\omega_0 = 0.063, \omega_1 = 0.794, \omega_2 = 2.145$ | M0 vs. M3      | $P < 0.0001$ |
| M0    | 160 | -2164 | $\omega_0 = 0.436$                                                                                 |                |              |
| M2a   | 163 | -2014 | $p_0 = 0.596, p_1 = 0.328, p_2 = 0.077,$<br>$\omega_0 = 0.069, \omega_1 = 1, \omega_2 = 3.081$     | M1a vs. M2a    | $P < 0.0001$ |
| M1a   | 161 | -2027 | $p_0 = 0.613, p_1 = 0.387,$<br>$\omega_0 = 0.062, \omega_1 = 1$                                    |                |              |
| M8    | 163 | -2012 | $p_0 = 0.87, p_1 = 0.130, p_2 = 0.214,$<br>$q = 0.441, \omega = 2.215$                             | M7 vs. M8      | $P < 0.0001$ |
| M7    | 161 | -2023 | $p = 0.064, q = 0.080$                                                                             |                |              |
| M8a   | 162 | -2020 | $p_0 = 0.732, p_1 = 0.268, p_2 = 0.390,$<br>$q = 2.177, \omega = 1$                                | M8a vs. M8     | $P < 0.0001$ |

Abbreviation:  $\omega$  = selection parameter;  $p_n$  = proportion of sites that fall into the  $\omega_n$  site class;  $p, q$  = shape parameters of the  $\beta$  function (for models M7 and M8).
